# Supplementary material for: Modification of PSf/SPSf Blended Porous Support for Improving the Reverse Osmosis Performance of Aromatic Polyamide Thin Film Composite Membranes
Source: MDPI journal article supplement (doi:10.3390/polym10060686), 2018-06-20
Supplement: s1 [file s1]

## Supplementary Materials

# Modification of PSf/SPSf Blended Porous Support for Improving the Reverse Osmosis Performance of Aromatic Polyamide Thin Film Composite Membranes

Li-Fen Liu <sup>1,2,\*</sup>, Xing-Ling Gu <sup>1</sup>, Xin Xie <sup>1</sup>, Rui-Han Li <sup>1</sup>, Chun-Yang Yu <sup>3</sup>, Xiao-Xiao Song <sup>1,2,\*</sup> and Cong-Jie Gao <sup>1,2</sup>

<sup>1</sup> Center for Membrane and Water Science and Technology, Ocean College, Zhejiang University of Technology, Hangzhou 310014, China; 13588348159@163.com (X.-L.G.); 15958041452@163.com (X.X.); 15857112095@163.com (R.-H.L.); gaocj@zjut.edu.cn (C.-J.G.)

<sup>2</sup> Collaborative Innovation Center of Membrane Separation and Water Treatment of Zhejiang Province, Hangzhou 310014, China

<sup>3</sup> State Key Laboratory of Metal Matrix Composites, School of Chemistry & Chemical Engineering, Shanghai Jiao Tong University, 800 Dongchuan Road, Shanghai 200240, China; chunyangyu@sjtu.edu.cn

\* Correspondence: lifenliu@zjut.edu.cn (L.-F.L.); songxiaoxiao@zjut.edu.cn (X.-X.S.); Tel.: +86-571-88325373 (L.-F.L.)

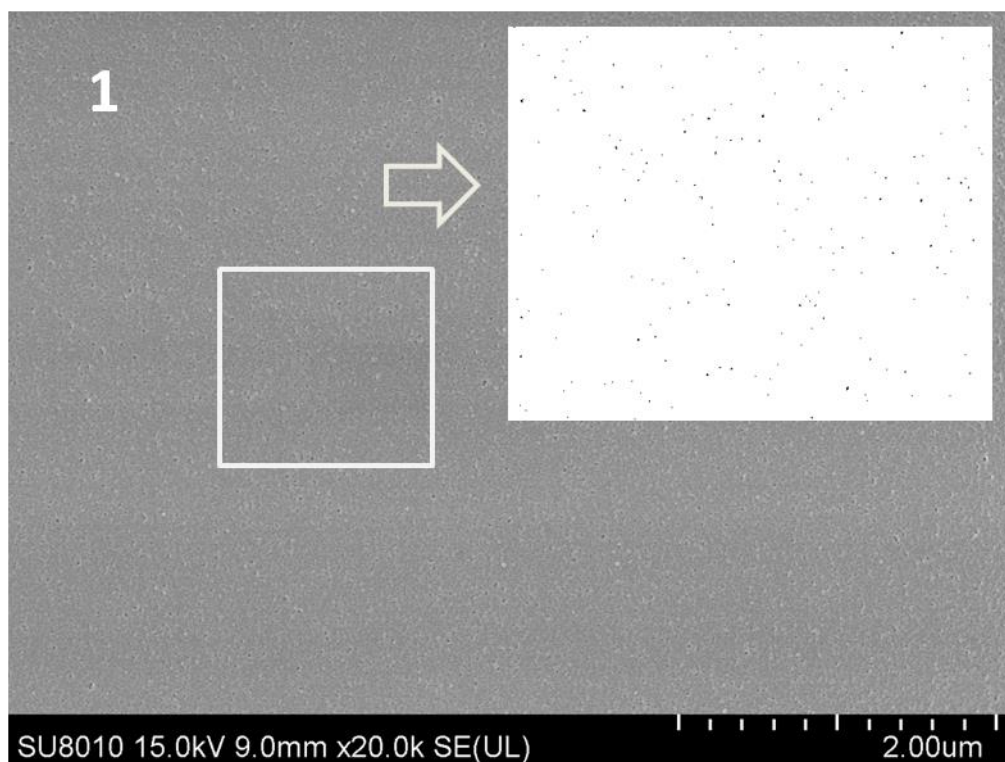

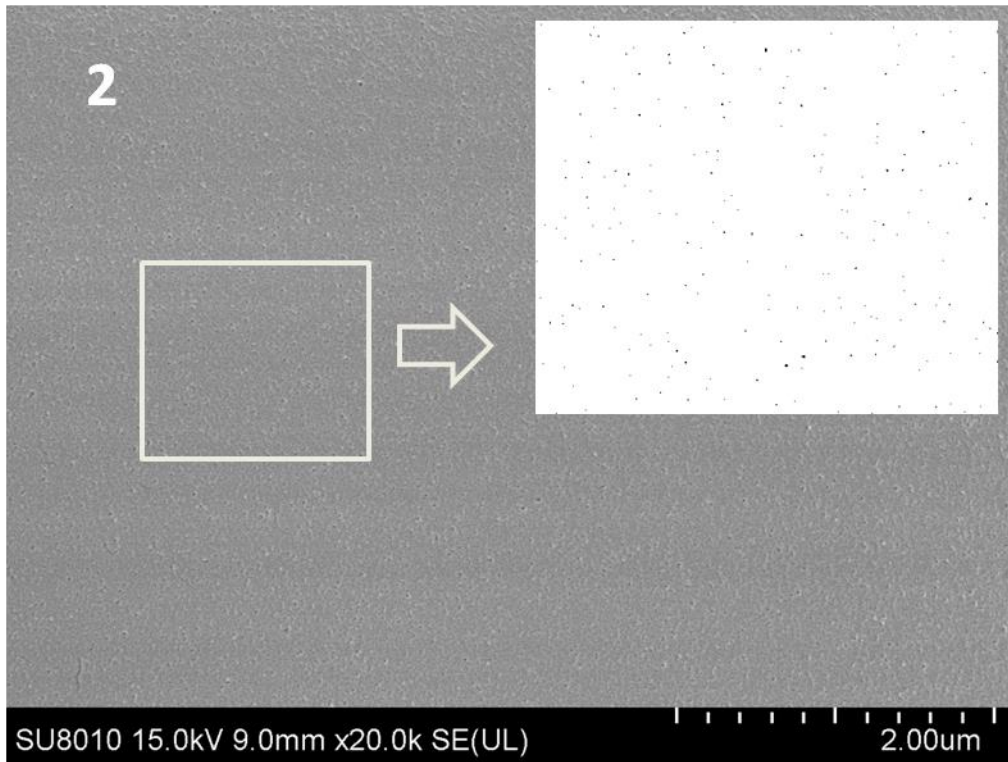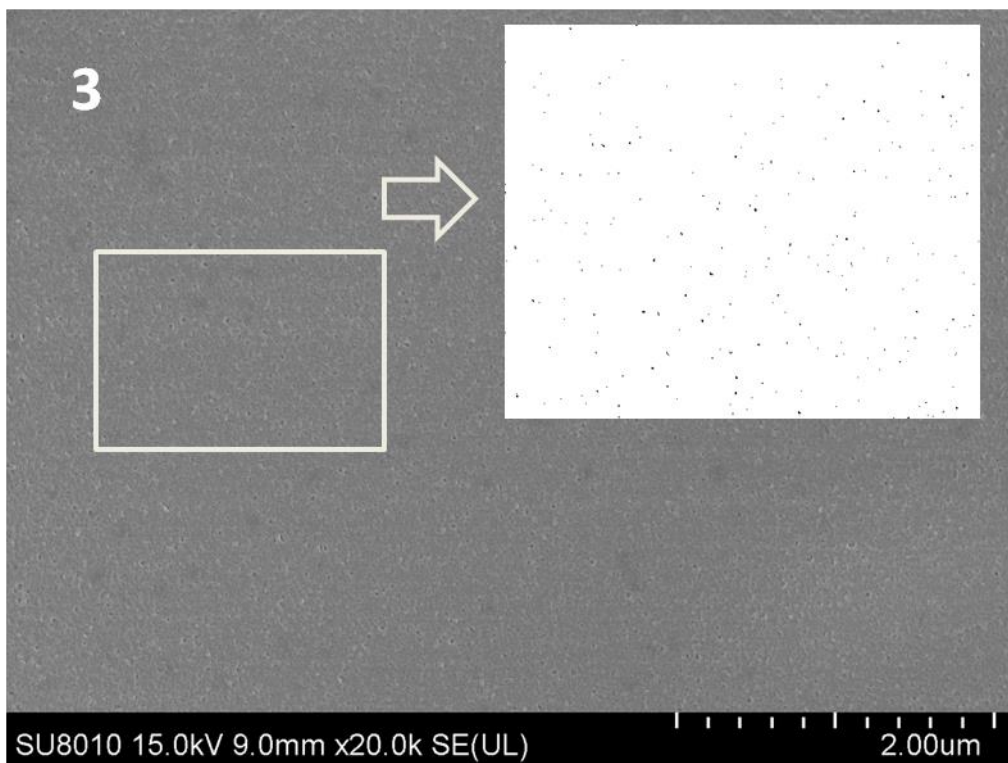

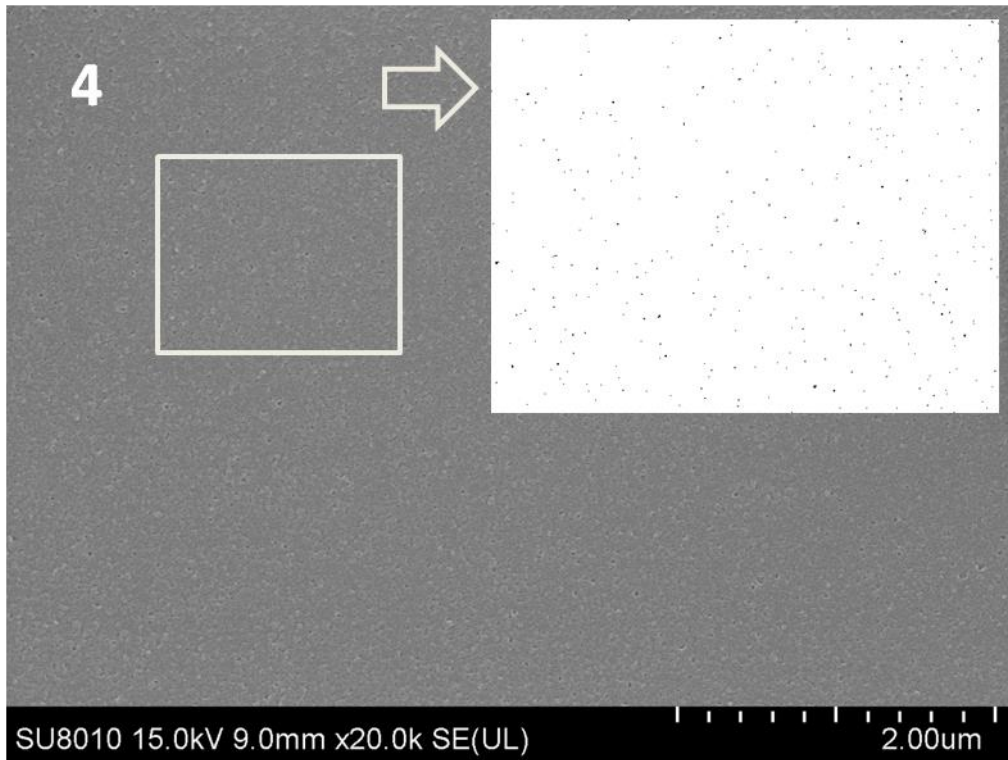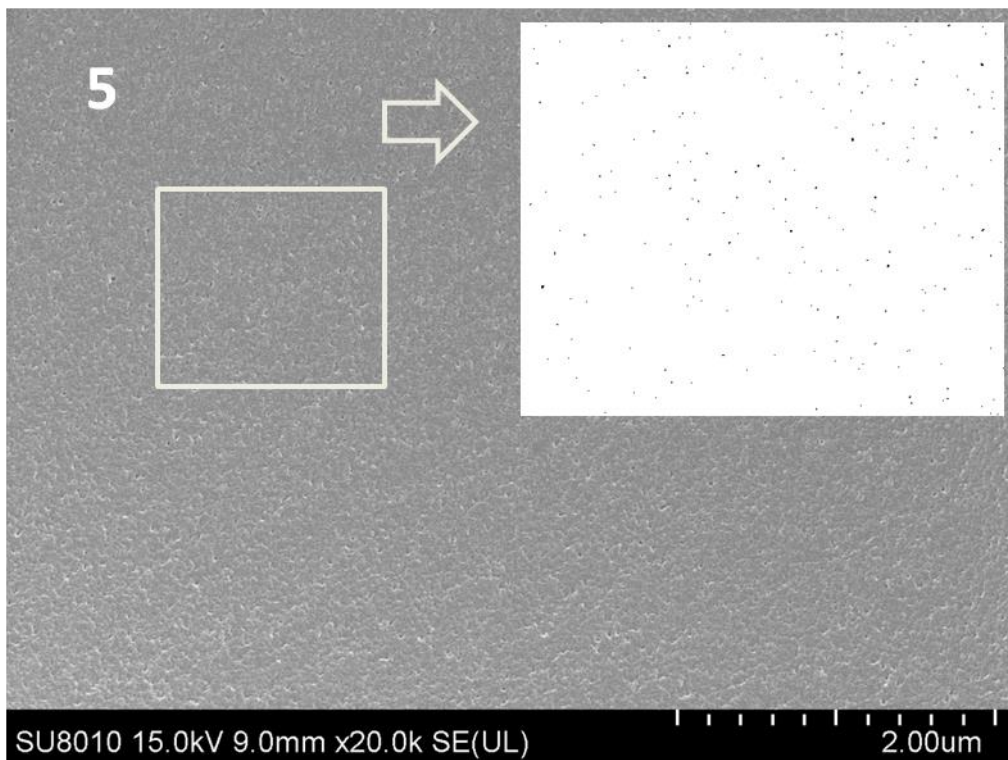

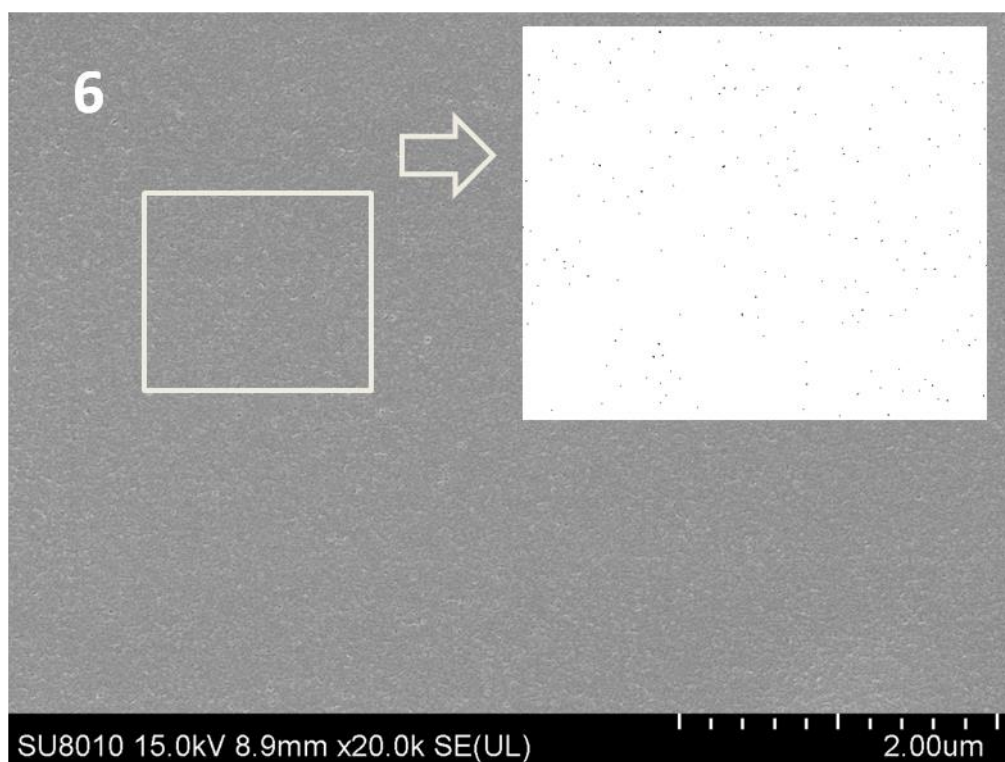

**Figure S1.** Surface SEM images of the 1–6 substrates and selected area for image analysis.

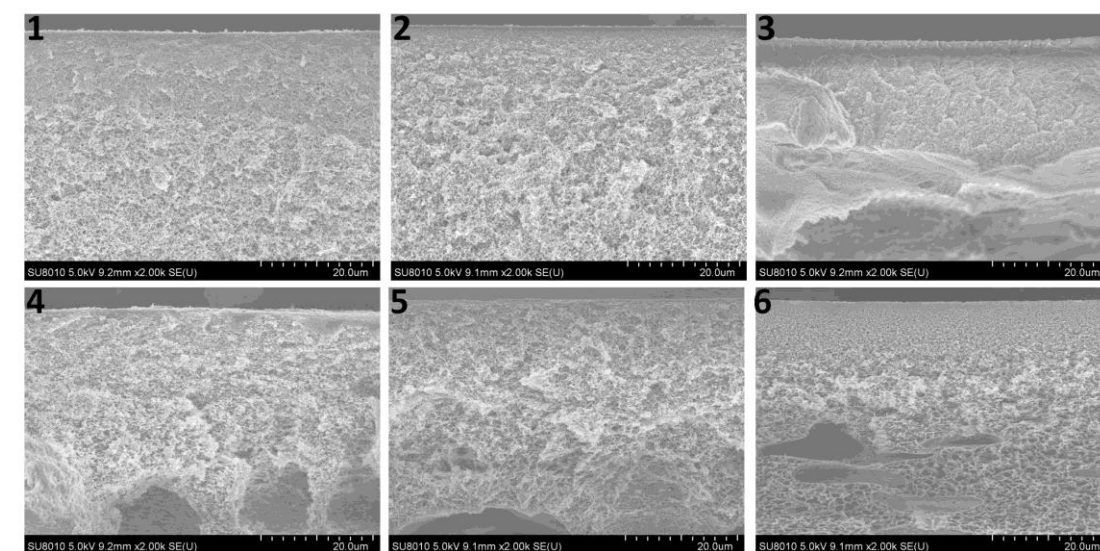

**Figure S2.** Cross-section images of the 1–6 porous supports.
